# Supplementary material
Source: HighWire-hosted journal article supplement (https://diabetes.diabetesjournals.org/content/suppl/2008/01/16/db07-0761)
Supplement: db070761onlineappendixfigure.pdf [file db070761onlineappendixfigure.pdf]

## **Online-Only Appendix**

### **1. Immunosuppression Schedule**

The main immunosuppressive regimens consisted of calcineurin inhibitors (CsA or tacrolimus) and glucocorticoids. Calcineurin inhibitors were started 2 days before the transplantation. Initially the doses of CsA (10 mg/kg) and tacrolimus (0.3 mg/kg) were administered twice daily. The target trough levels of CsA and tacrolimus were as follows: 1) months 0–3: 150–300 ng/ml for CsA and 10–20 ng/ml for tacrolimus; 2) months 3–6: 150–200 ng/ml for CsA and 10–15 ng/ml for tacrolimus; and 3) 6 months: 75–150 ng/ml for CsA and 8–10 ng/ml for tacrolimus. Administration of oral prednisolone at 1 mg/kg/day began 2 days before the transplantation. Methylprednisolone was administered intravenously for the first 4 postoperative days in a tapered fashion: day 0, 1 g; day 1, 500 mg; day 2, 250 mg; and day 3, 60 mg. Administration of oral prednisolone began after the 4th posttransplantation day at 30 mg/day and was gradually tapered to 10 mg/day within 1 month. For acute rejection, a total of 2 g methylprednisolone was administered for 5 days. For the triple regimen, the target plasma trough levels of CsA and tacrolimus were lower than those for the double regimen: 75–100 ng/ml for CsA and 5–10 ng/ml for tacrolimus.

### **2. Patients enrollment**

We initially recruited 805 unrelated transplant recipients for this study. Among them, 103 patients were excluded because they had a recorded fasting plasma glucose (FPG) level  $\geq 5.5$  mmol/L. Thirty patients had diabetes before transplantation, 35 patients had repeated renal allograft operation, and 13 patients were younger than 18 years. We were left with 624 patients.

### **3. Patients phenotyping**

According to our previous study (15), cases of persistent PTDM (patients who developed diabetes within one year posttransplantation and remained diabetic) and late PTDM (L-PTDM; patients who developed diabetes after one year posttransplantation) were assigned to the PTDM group. Transient PTDM cases (T-PTDM; patients who developed diabetes within one year posttransplantation but eventually recovered to normoglycemia without medication) were classified as non-PTDM. Among 174 PTDM patients, 106 patients had L-PTDM. We classified L-PTDM patients with the PTDM group. There were 98 patients with T-PTDM and we classified these patients with the non-PTDM group.

### **4. Genetic effect on prevalence of L-PTDM and T-PTDM**

There was no significant difference in the prevalence of L-PTDM among the PTDM group according to genotype ( $p=0.723$ ). Also there was no significant difference in the prevalence of T-PTDM among the non-PTDM group according to genotype ( $p=0.304$ ).

|            | RR         | RW         | WW         | p     |
|------------|------------|------------|------------|-------|
| L-PTDM     | 41 (58.6%) | 50 (61.0%) | 15 (68.2%) | 0.723 |
| Total PTDM | 70         | 82         | 22         |       |

|          | RR         | RW         | WW         | P     |
|----------|------------|------------|------------|-------|
| T-PTDM   | 32 (41.4%) | 52 (39.0%) | 14 (31.8%) | 0.304 |
| Non-PTDM | 137        | 224        | 89         |       |

#### 4. Steroid Dose

We analyzed the dose of glucocorticoids at the time of development of PTDM. Prednisolone (Solondo®) and Deflazacort (Calcort®) were the main glucocorticoid regimens used in prevention of rejection. The usual dose of prednisolone was 10 mg/day and that of deflazacort was 12 mg/day, because prednisolone is known to be 1.2-1.5 times more potent than deflazacort, we converted the deflazacort dose to a corresponding prednisolone dose by multiplying by 0.8. We got the following results;

- 1) There was no significant difference in the cumulative dose of steroid according to genotype (RR 18,688 ± 1,936 mg, RW 17,849 ± 1,599 mg, WW 18,006 ± 3,300mg, p=0.943).
- 2) There was no significant difference in steroid dose (transformed dose) between the PTDM and non-PTDM groups (PTDM group; 9.55 ± 1.50 mg/day prednisolone vs. non-PTDM group; 9.57 ± 1.39 mg/day prednisolone, p=0.892).

#### 4. Patient visiting schedule

##### (1) Follow-up frequency

- ① First month after discharge: 3 times/week
- ② 2<sup>nd</sup> month after discharge: 2 times/week
- ③ 3<sup>rd</sup> month after discharge: 1 time/week - every 10 days
- ④ 4<sup>th</sup> month after discharge: every 10-14 days
- ⑤ 5<sup>th</sup> month after discharge: every 3 weeks
- ⑥ 6<sup>th</sup> ~12 month after discharge: every month
- ⑦ After 1 year: every 1 - 2 months

##### (2) Follow up data collection

- ① Every visit: blood pressure, body weight, pulse rate, complete blood count, BUN/Creatinine, drug-level (cyclosporine or tacrolimus), serum electrolyte, urine

analysis, plasma glucose, lipid profiles (total cholesterol, LDL-cholesterol, HDL-cholesterol, triglyceride)

- ② Every 2-3 months: liver function test, HbA1c (if indicated)
- ③ Every 1 year: 24-hour urine collection for proteinuria and creatinine clearance, viral hepatitis study (HBV and HCV), bone densitometry, parathyroid hormone level (PTH), plasma insulin
- ④ Frequently performed: chest PA X-ray, cancer surveillance (AFP, CEA, etc)

### References

1. Hur KY, Kim MS, Kim YS, Kang ES, Nam JH, Kim SH, Nam CM, Ahn CW, Cha BS, Kim SI, Lee HC: Risk factors associated with the onset and progression of posttransplantation diabetes in renal allograft recipients. *Diabetes Care* 30:609-615, 2007
- 2 Kang ES, Kim MS, Kim YS, Hur KY, Han SJ, Nam CM, Ahn CW, Cha BS, Kim SI, Lee HC. A Variant of the Transcription Factor 7-like 2 (TCF7L2) Gene and the Risk of Post-transplant Diabetes Mellitus (PTDM) in Renal Allograft Recipients. *Diabetes Care*. 2007 Oct 12; [Epub ahead of print]
